# Supplementary material for: GNS561 Exhibits Potent Antiviral Activity against SARS-CoV-2 through Autophagy Inhibition
Source: MDPI journal article supplement (doi:10.3390/v14010132), 2022-01-12
Supplement: s1 [file s1]

# GNS561 exhibits potent antiviral activity against SARS-CoV-2 through autophagy inhibition

Eloïne Bestion<sup>1,2,3</sup>, Keivan Zandi<sup>4</sup>, Sandrine Belouzard<sup>5</sup>, Julien Andreani<sup>2,3</sup>, Hubert Lepidi<sup>6</sup>, Marie Novello<sup>1</sup>, Clara Rouquairol<sup>1</sup>, Jean-Pierre Baudoin<sup>2,3</sup>, Madani Rachid<sup>1</sup>, Bernard La Scola<sup>2,3</sup>, Jean-Louis Mege<sup>2,3</sup>, Jean Dubuisson<sup>5</sup>, Raymond F. Schinazi<sup>4,†</sup>, Soraya Mezouar<sup>1,2,3,†</sup> and Philippe Halfon<sup>1,\*,†</sup>

**Table S1.** Primer and probe sequences for SARS-CoV-2 E (cells) and N (mouse) genes q-RTPCR investigation

| SARS-CoV-2 Primers/Probes |         | Sequences                                      |
|---------------------------|---------|------------------------------------------------|
| Cell assays               | Forward | 5'-GAC CCC AAA ATC AGC GAA AT-3'               |
|                           | Reverse | 5'-TCT GGT TAC TGC CAG TTG AAT CTG-3'          |
|                           | Probe   | 5'-FAM-ACC CCG CAT TAC GTT TGG TGG ACC-BHQ1-3' |
| Mouse assays              | Forward | 5'-TAA TGG ACC CCA AAA TCA GC-3'               |
|                           | Reverse | 5'-GAA TCT GAG GGT CCA CCA AA-3'               |

## Figures

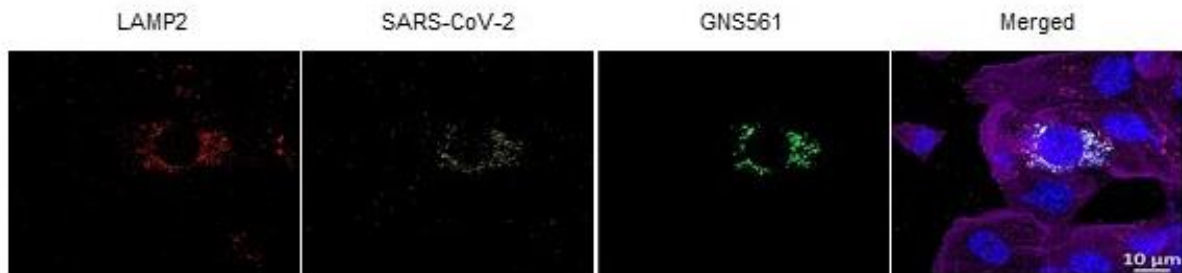

**Figure S1.** SARS-CoV-2 and GNS561 localization inside lysosomes. After 2 hours of treatment with 4  $\mu$ M GNS561, Vero E6 cells were infected with SARS-CoV-2 IHUMI-6 strain for an additional 48 hours. Representative confocal images showing the localization of SARS-CoV-2 (yellow) inside LAMP2-positive lysosomes (red) together with GNS561 (green) inside Vero E6 cells are exposed.

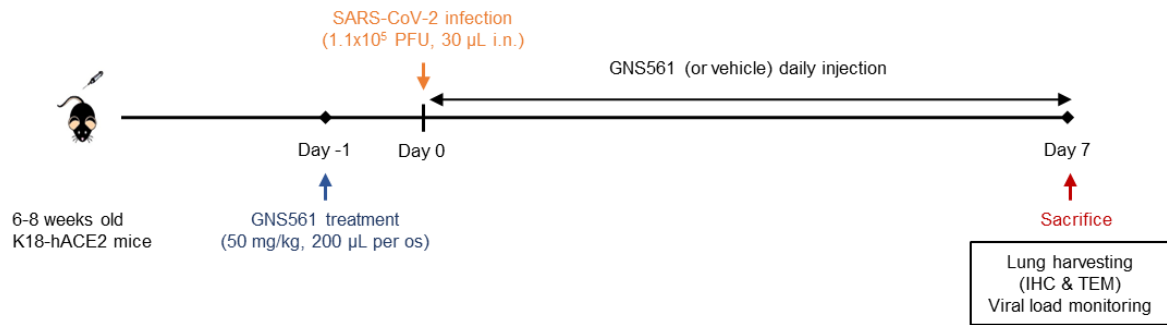

**Figure S2.** Study design of K18-hACE C57BL/6J mice model. Eight to nine-week-old K18-hACE C57BL/6J mice were treated with GNS561 (50 mg / kg, 200 µL) or with vehicle per os 24h before intranasally SARS-CoV-2 infection (1.1x10<sup>5</sup> PFU, 30 µL). Mice were then daily injected with GNS561 or vehicle until sacrifice 7 days post-infection. IHC: immunohistochemistry, i.n.: intranasally, TEM: transmitted electron microcopy.
